# Supplementary material for: Predictive value of macrophage inflammatory protein 3β in the risk of death in sepsis patients
Source: Research Square preprint supplement (doi:10.21203/rs.3.rs-6471946/v1), 2025-05-20
Supplement: Supplementary file 1 [file 3ca35b84dc0375d1aa3dc721.xlsx]

## Sheet: Sheet1
			曲线的坐标
			检验结果变量	大于或等于此值时为正a	敏感度	1 - 特异性	值				敏感度	1 - 特异性	值	敏感度	1 - 特异性
			MIP-3 beta	10.6877	1	1	0		SOFA	5.5	0.808219	0.208333	0.599886	0.808219	0.791667
				11.7341	1	0.972222	0.0277778			6.5	0.671233	0.125	0.546233
				14.6428	1	0.944444	0.0555556			7.5	0.561644	0.0416667	0.519977
				20.6663	1	0.930556	0.0694444			8.5	0.493151	0.0277778	0.465373
				25.8936	1	0.902778	0.0972222			9.5	0.39726	0.0277778	0.369482
				28.0939	0.986301	0.902778	0.0835236			3.5	0.952055	0.597222	0.354833
				28.7285	0.972603	0.902778	0.069825			4.5	0.90411	0.597222	0.306887
				29.5782	0.965753	0.902778	0.0629756			10.5	0.232877	0.0277778	0.205099
				29.9463	0.952055	0.902778	0.049277			11.5	0.226027	0.0277778	0.19825
				30.149	0.945205	0.902778	0.0424277			12.5	0.136986	0.0277778	0.109209
				30.977	0.945205	0.888889	0.0563166			13.5	0.130137	0.0277778	0.102359
				31.9888	0.945205	0.875	0.0702055			2.5	0.958904	0.861111	0.097793
				32.3914	0.945205	0.861111	0.0840944			1.5	0.986301	0.930556	0.0557458
				32.6045	0.931507	0.861111	0.0703957			14.5	0.0616438	0.0277778	0.0338661
				33.0293	0.917808	0.861111	0.0566971			15.5	0.0547945	0.0277778	0.0270167
				34.2411	0.910959	0.861111	0.0498478			16.5	0.0479452	0.0277778	0.0201674
				35.4179	0.90411	0.861111	0.0429985			0.5	1	0.986111	0.0138889
				36.2907	0.890411	0.861111	0.0292998			22	0.0205479	0.0138889	0.00665906
				37.1354	0.883562	0.861111	0.0224505			18	0.0342466	0.0277778	0.0064688
				37.8059	0.876712	0.861111	0.0156012			-1	1	1	0
				38.5406	0.863014	0.861111	0.00190259			25	0	0	0
				39.1099	0.863014	0.847222	0.0157915			19.5	0.0273973	0.0277778	-0.000380518
				39.569	0.863014	0.833333	0.0296804
				40.0187	0.856164	0.833333	0.0228311
				40.552	0.856164	0.805556	0.0506088
				40.9504	0.842466	0.805556	0.0369102
				41.7468	0.842466	0.75	0.0924658
				42.7806	0.842466	0.722222	0.120244
				43.7529	0.842466	0.708333	0.134132
				44.5757	0.842466	0.680556	0.16191
				45.1057	0.828767	0.680556	0.148212
				46.5179	0.821918	0.666667	0.155251
				49.8351	0.808219	0.666667	0.141553
				52.2803	0.808219	0.638889	0.16933
				52.9227	0.808219	0.625	0.183219
				53.3816	0.794521	0.625	0.169521
				55.325	0.787671	0.625	0.162671
				57.2645	0.773973	0.625	0.148973
				57.6163	0.760274	0.625	0.135274
				58.1	0.746575	0.625	0.121575
				58.4209	0.739726	0.611111	0.128615
				58.5679	0.739726	0.597222	0.142504
				58.7974	0.739726	0.583333	0.156393
				59.1647	0.732877	0.583333	0.149543
				60.1748	0.732877	0.569444	0.163432
				61.2768	0.726027	0.569444	0.156583
				61.8279	0.719178	0.569444	0.149734
				62.1953	0.712329	0.569444	0.142884
				62.3255	0.705479	0.569444	0.136035
				62.5551	0.705479	0.541667	0.163813
				62.8627	0.705479	0.527778	0.177702
				63.0464	0.705479	0.5	0.205479
				63.6616	0.69863	0.5	0.19863
				64.3047	0.684932	0.5	0.184932
				64.5839	0.684932	0.486111	0.19882
				65.0157	0.678082	0.486111	0.191971
				65.705	0.664384	0.486111	0.178272
				66.2322	0.657534	0.486111	0.171423
				66.4938	0.643836	0.486111	0.157725
				67.0054	0.630137	0.444444	0.185693
				67.7961	0.623288	0.444444	0.178843
				70.2718	0.609589	0.444444	0.165145
				72.4842	0.609589	0.416667	0.192922
				73.4508	0.60274	0.416667	0.186073
				76.0274	0.59589	0.402778	0.193113
				77.969	0.589041	0.388889	0.200152
				78.8921	0.582192	0.388889	0.193303
				79.8599	0.582192	0.361111	0.221081
				80.2289	0.582192	0.347222	0.23497
				80.5977	0.575342	0.347222	0.22812
				81.8429	0.568493	0.347222	0.221271
				83.5762	0.561644	0.347222	0.214422
				84.4991	0.561644	0.333333	0.228311
				86.4796	0.554795	0.333333	0.221461
				88.7891	0.554795	0.305556	0.249239
				90.7096	0.554795	0.291667	0.263128
				92.4671	0.554795	0.277778	0.277017
				93.0687	0.547945	0.277778	0.270167
				94.0365	0.541096	0.277778	0.263318
				95.2603	0.527397	0.277778	0.249619
				95.8668	0.513699	0.277778	0.235921
				96.4844	0.506849	0.277778	0.229072
				98.1533	0.493151	0.277778	0.215373
				99.4335	0.493151	0.263889	0.229262
				100.779	0.479452	0.263889	0.215563
				102.944	0.472603	0.263889	0.208714
				104.978	0.472603	0.25	0.222603
				109.32	0.458904	0.25	0.208904
				112.688	0.445205	0.25	0.195205
				114.109	0.431507	0.25	0.181507
				115.841	0.417808	0.25	0.167808
				116.997	0.40411	0.25	0.15411
				118.109	0.390411	0.25	0.140411
				119.177	0.383562	0.25	0.133562
				121.329	0.369863	0.25	0.119863
				125.392	0.369863	0.236111	0.133752
				128.489	0.363014	0.236111	0.126903
				130.676	0.363014	0.222222	0.140791
				132.48	0.363014	0.194444	0.168569
				134.632	0.349315	0.194444	0.154871
				137.054	0.349315	0.166667	0.182648
				138.365	0.335616	0.166667	0.16895
				140.794	0.328767	0.166667	0.1621
				146.332	0.315068	0.166667	0.148402
				150.666	0.30137	0.166667	0.134703
				151.288	0.287671	0.166667	0.121005
				152.642	0.280822	0.166667	0.114155
				153.923	0.273973	0.166667	0.107306
				154.542	0.260274	0.166667	0.0936073
				155.086	0.253425	0.166667	0.086758
				159.768	0.239726	0.166667	0.0730594
				166.696	0.232877	0.166667	0.06621
				170.2	0.232877	0.138889	0.0939878
				172.126	0.219178	0.138889	0.0802892
				172.998	0.212329	0.125	0.0873288
				173.759	0.19863	0.125	0.0736301
				176.794	0.19863	0.111111	0.087519
				179.161	0.191781	0.111111	0.0806697
				179.935	0.184932	0.0972222	0.0877093
				181.781	0.184932	0.0833333	0.101598
				188.488	0.171233	0.0833333	0.0878995
				198.079	0.164384	0.0833333	0.0810502
				210.44	0.150685	0.0833333	0.0673516
				222.273	0.150685	0.0555556	0.0951294
				230.262	0.136986	0.0555556	0.0814307
				235.638	0.130137	0.0555556	0.0745814
				245.641	0.130137	0.0277778	0.102359
				255.257	0.116438	0.0277778	0.0886606
				257.171	0.109589	0.0277778	0.0818113
				265.728	0.0958904	0.0277778	0.0681126
				275.696	0.0821918	0.0277778	0.054414
				280.975	0.0684932	0.0277778	0.0407154
				289.499	0.0684932	0.0138889	0.0546043
				296.454	0.0547945	0.0138889	0.0409056
				304.205	0.0410959	0.0138889	0.027207
				311.783	0.0410959	0	0.0410959
				323.663	0.0342466	0	0.0342466
				338.404	0.0273973	0	0.0273973
				379.737	0.0205479	0	0.0205479
				507.351	0.00684932	0	0.00684932
				598.136	0	0	0
			检验结果变量 MIP-3 beta, SOFA, APACHE2 至少有一个在正实际状态组与负实际状态组之间的绑定值。
			a. 最小分界值为最小实测检验值减 1，最大分界值为最大实测检验值加 1。所有其他分界值均为两个连续的有序实测检验值的平均值。

## Sheet: Sheet2
检验结果变量	大于或等于此值时为正a	敏感度	1 - 特异性	值	敏感度	特异性
	92.4671	0.554795	0.277778	0.277017	0.554795	0.722222
	93.0687	0.547945	0.277778	0.270167
	94.0365	0.541096	0.277778	0.263318
	90.7096	0.554795	0.291667	0.263128
	95.2603	0.527397	0.277778	0.249619
	88.7891	0.554795	0.305556	0.249239
	95.8668	0.513699	0.277778	0.235921
	80.2289	0.582192	0.347222	0.23497
	99.4335	0.493151	0.263889	0.229262
	96.4844	0.506849	0.277778	0.229072
	84.4991	0.561644	0.333333	0.228311
	80.5977	0.575342	0.347222	0.22812
	104.978	0.472603	0.25	0.222603
	86.4796	0.554795	0.333333	0.221461
	81.8429	0.568493	0.347222	0.221271
	79.8599	0.582192	0.361111	0.221081
	100.779	0.479452	0.263889	0.215563
	98.1533	0.493151	0.277778	0.215373
	83.5762	0.561644	0.347222	0.214422
	109.32	0.458904	0.25	0.208904
	102.944	0.472603	0.263889	0.208714
	63.0464	0.705479	0.5	0.205479
	77.969	0.589041	0.388889	0.200152
	64.5839	0.684932	0.486111	0.19882
	63.6616	0.69863	0.5	0.19863
	112.688	0.445205	0.25	0.195205
	78.8921	0.582192	0.388889	0.193303
	76.0274	0.59589	0.402778	0.193113
	72.4842	0.609589	0.416667	0.192922
	65.0157	0.678082	0.486111	0.191971
	73.4508	0.60274	0.416667	0.186073
	67.0054	0.630137	0.444444	0.185693
	64.3047	0.684932	0.5	0.184932
	52.9227	0.808219	0.625	0.183219
	137.054	0.349315	0.166667	0.182648
	114.109	0.431507	0.25	0.181507
	67.7961	0.623288	0.444444	0.178843
	65.705	0.664384	0.486111	0.178272
	62.8627	0.705479	0.527778	0.177702
	66.2322	0.657534	0.486111	0.171423
	53.3816	0.794521	0.625	0.169521
	52.2803	0.808219	0.638889	0.16933
	138.365	0.335616	0.166667	0.16895
	132.48	0.363014	0.194444	0.168569
	115.841	0.417808	0.25	0.167808
	70.2718	0.609589	0.444444	0.165145
	62.5551	0.705479	0.541667	0.163813
	60.1748	0.732877	0.569444	0.163432
	55.325	0.787671	0.625	0.162671
	140.794	0.328767	0.166667	0.1621
	44.5757	0.842466	0.680556	0.16191
	66.4938	0.643836	0.486111	0.157725
	61.2768	0.726027	0.569444	0.156583
	58.7974	0.739726	0.583333	0.156393
	46.5179	0.821918	0.666667	0.155251
	134.632	0.349315	0.194444	0.154871
	116.997	0.40411	0.25	0.15411
	61.8279	0.719178	0.569444	0.149734
	59.1647	0.732877	0.583333	0.149543
	57.2645	0.773973	0.625	0.148973
	146.332	0.315068	0.166667	0.148402
	45.1057	0.828767	0.680556	0.148212
	62.1953	0.712329	0.569444	0.142884
	58.5679	0.739726	0.597222	0.142504
	49.8351	0.808219	0.666667	0.141553
	130.676	0.363014	0.222222	0.140791
	118.109	0.390411	0.25	0.140411
	62.3255	0.705479	0.569444	0.136035
	57.6163	0.760274	0.625	0.135274
	150.666	0.30137	0.166667	0.134703
	43.7529	0.842466	0.708333	0.134132
	125.392	0.369863	0.236111	0.133752
	119.177	0.383562	0.25	0.133562
	58.4209	0.739726	0.611111	0.128615
	128.489	0.363014	0.236111	0.126903
	58.1	0.746575	0.625	0.121575
	151.288	0.287671	0.166667	0.121005
	42.7806	0.842466	0.722222	0.120244
	121.329	0.369863	0.25	0.119863
	152.642	0.280822	0.166667	0.114155
	153.923	0.273973	0.166667	0.107306
	245.641	0.130137	0.0277778	0.102359
	181.781	0.184932	0.0833333	0.101598
	25.8936	1	0.902778	0.0972222
	222.273	0.150685	0.0555556	0.0951294
	170.2	0.232877	0.138889	0.0939878
	154.542	0.260274	0.166667	0.0936073
	41.7468	0.842466	0.75	0.0924658
	255.257	0.116438	0.0277778	0.0886606
	188.488	0.171233	0.0833333	0.0878995
	179.935	0.184932	0.0972222	0.0877093
	176.794	0.19863	0.111111	0.087519
	172.998	0.212329	0.125	0.0873288
	155.086	0.253425	0.166667	0.086758
	32.3914	0.945205	0.861111	0.0840944
	28.0939	0.986301	0.902778	0.0835236
	257.171	0.109589	0.0277778	0.0818113
	230.262	0.136986	0.0555556	0.0814307
	198.079	0.164384	0.0833333	0.0810502
	179.161	0.191781	0.111111	0.0806697
	172.126	0.219178	0.138889	0.0802892
	235.638	0.130137	0.0555556	0.0745814
	173.759	0.19863	0.125	0.0736301
	159.768	0.239726	0.166667	0.0730594
	32.6045	0.931507	0.861111	0.0703957
	31.9888	0.945205	0.875	0.0702055
	28.7285	0.972603	0.902778	0.069825
	20.6663	1	0.930556	0.0694444
	265.728	0.0958904	0.0277778	0.0681126
	210.44	0.150685	0.0833333	0.0673516
	166.696	0.232877	0.166667	0.06621
	29.5782	0.965753	0.902778	0.0629756
	33.0293	0.917808	0.861111	0.0566971
	30.977	0.945205	0.888889	0.0563166
	14.6428	1	0.944444	0.0555556
	289.499	0.0684932	0.0138889	0.0546043
	275.696	0.0821918	0.0277778	0.054414
	40.552	0.856164	0.805556	0.0506088
	34.2411	0.910959	0.861111	0.0498478
	29.9463	0.952055	0.902778	0.049277
	35.4179	0.90411	0.861111	0.0429985
	30.149	0.945205	0.902778	0.0424277
	311.783	0.0410959	0	0.0410959
	296.454	0.0547945	0.0138889	0.0409056
	280.975	0.0684932	0.0277778	0.0407154
	40.9504	0.842466	0.805556	0.0369102
	323.663	0.0342466	0	0.0342466
	39.569	0.863014	0.833333	0.0296804
	36.2907	0.890411	0.861111	0.0292998
	11.7341	1	0.972222	0.0277778
	338.404	0.0273973	0	0.0273973
	304.205	0.0410959	0.0138889	0.027207
	40.0187	0.856164	0.833333	0.0228311
	37.1354	0.883562	0.861111	0.0224505
	379.737	0.0205479	0	0.0205479
	39.1099	0.863014	0.847222	0.0157915
	37.8059	0.876712	0.861111	0.0156012
	507.351	0.00684932	0	0.00684932
	38.5406	0.863014	0.861111	0.00190259
MIP-3 beta	10.6877	1	1	0
	598.136	0	0	0

## Sheet: Sheet3
检验结果变量	大于或等于此值时为正a	敏感度	1 - 特异性	值	敏感度	特异性
APACHE2	21.5	0.534247	0.0833333	0.450913	0.534247	0.916667
	20.5	0.582192	0.138889	0.443303
	18.5	0.643836	0.236111	0.407725
	22.5	0.458904	0.0555556	0.403349
	19.5	0.589041	0.194444	0.394597
	17.5	0.69863	0.319444	0.379186
	23.5	0.424658	0.0555556	0.369102
	16.5	0.767123	0.402778	0.364346
	24.5	0.383562	0.0416667	0.341895
	15.5	0.80137	0.5	0.30137
	25.5	0.342466	0.0416667	0.300799
	26.5	0.287671	0.0416667	0.246005
	14	0.842466	0.597222	0.245244
	27.5	0.246575	0.0416667	0.204909
	28.5	0.219178	0.0416667	0.177511
	12.5	0.842466	0.680556	0.16191
	29.5	0.184932	0.0416667	0.143265
	11.5	0.883562	0.75	0.133562
	10.5	0.938356	0.805556	0.132801
	30.5	0.164384	0.0416667	0.122717
	9.5	0.979452	0.875	0.104452
	32.5	0.130137	0.0277778	0.102359
	31.5	0.143836	0.0416667	0.102169
	8.5	0.979452	0.902778	0.0766743
	33.5	0.0958904	0.0277778	0.0681126
	7.5	0.979452	0.916667	0.0627854
	34.5	0.0821918	0.0277778	0.054414
	5.5	0.993151	0.944444	0.0487062
	36.5	0.0616438	0.0138889	0.0477549
	35.5	0.0753425	0.0277778	0.0475647
	6.5	0.986301	0.944444	0.0418569
	38.5	0.0410959	0	0.0410959
	40.5	0.0342466	0	0.0342466
	37.5	0.0479452	0.0138889	0.0340563
	43	0.0273973	0	0.0273973
	45	0.0205479	0	0.0205479
	2.5	1	0.986111	0.0138889
	47	0.0136986	0	0.0136986
	48.5	0.00684932	0	0.00684932
	-1	1	1	0
	50	0	0	0
